# Supplementary material for: Displacement, Violence, and Mental Health: Evidence from Rohingya Adolescents in Cox’s Bazar, Bangladesh
Source: MDPI journal article supplement (doi:10.3390/ijerph18105318), 2021-05-17
Supplement: s1 [file s1]

# Supplementary Materials for Displacement, Violence, and Mental Health: Evidence from Rohingya Adolescents in Cox's Bazar, Bangladesh

**Table S1.** Summary Statistics of Traumatic Events by Item.

|                                                    | (1)      | (2)         | (3)     |
|----------------------------------------------------|----------|-------------|---------|
|                                                    | Rohingya | Bangladeshi | p-value |
| <b>A. Experience Traumatic Events</b>              |          |             |         |
| =1 if Experience imprisonment                      | 0.127    | 0.103       | 0.449   |
| =1 if Experience serious injury                    | 0.277    | 0.290       | 0.785   |
| =1 if Experience combat situation                  | 0.410    | 0.151       | 0.000   |
| =1 if Experience rape or sexual abuse              | 0.016    | 0.011       | 0.613   |
| =1 if Experience isolation                         | 0.275    | 0.022       | 0.000   |
| =1 if Experience being close to death              | 0.483    | 0.232       | 0.000   |
| =1 if Experience force separation from family      | 0.178    | 0.050       | 0.000   |
| =1 if Experience murder of family or friend        | 0.107    | 0.040       | 0.015   |
| =1 if Experience murder of stranger(s)             | 0.107    | 0.040       | 0.015   |
| =1 if Experience lost or kidnapped                 | 0.092    | 0.050       | 0.073   |
| =1 if Experience torture                           | 0.407    | 0.043       | 0.000   |
| =1 if Experience unnatural death of family/friend  | 0.279    | 0.174       | 0.012   |
| <b>B. Witness Traumatic Events</b>                 |          |             |         |
| =1 if Witness imprisonment                         | 0.490    | 0.304       | 0.000   |
| =1 if Witness serious injury                       | 0.487    | 0.271       | 0.000   |
| =1 if Witness combat situation                     | 0.419    | 0.234       | 0.000   |
| =1 if Witness rape or sexual abuse                 | 0.253    | 0.069       | 0.000   |
| =1 if Witness isolation                            | 0.264    | 0.078       | 0.000   |
| =1 if Witness being close to death                 | 0.174    | 0.141       | 0.285   |
| =1 if Witness force separation from family         | 0.119    | 0.046       | 0.003   |
| =1 if Witness murder of family or friend           | 0.355    | 0.065       | 0.000   |
| =1 if Witness murder of stranger(s)                | 0.355    | 0.065       | 0.000   |
| =1 if Witness lost or kidnapped                    | 0.246    | 0.058       | 0.000   |
| =1 if Witness torture                              | 0.258    | 0.153       | 0.006   |
| =1 if Witness unnatural death of family or friend  | 0.087    | 0.109       | 0.410   |
| <b>C. Heard of Traumatic Events</b>                |          |             |         |
| =1 if Heard of imprisonment                        | 0.326    | 0.468       | 0.002   |
| =1 if Heard of serious injury                      | 0.187    | 0.281       | 0.026   |
| =1 if Heard of combat situation                    | 0.145    | 0.477       | 0.000   |
| =1 if Heard of rape or sexual abuse                | 0.666    | 0.639       | 0.575   |
| =1 if Heard of isolation                           | 0.276    | 0.358       | 0.058   |
| =1 if Heard of being close to death                | 0.201    | 0.287       | 0.038   |
| =1 if Heard of force separation from family        | 0.127    | 0.213       | 0.014   |
| =1 if Heard of murder of family or friend          | 0.464    | 0.583       | 0.020   |
| =1 if Heard of murder of stranger(s)               | 0.464    | 0.583       | 0.020   |
| =1 if Heard of lost or kidnapped                   | 0.531    | 0.588       | 0.233   |
| =1 if Heard of torture                             | 0.233    | 0.376       | 0.001   |
| =1 if Heard of unnatural death of family or friend | 0.080    | 0.162       | 0.009   |

Notes. All means calculated using sampling weights to make them representative of populations in the sampling area. p-values presented in column 3 are from a test of differences of means between the Rohingya and Bangladeshi populations, with standard errors clustered at the respective geographic sampling level (camp-block for Rohingya and sub-mauza for Bangladeshis).

**Table S2.** Association between individual traumatic events and mental health outcomes among Rohingya Adolescents.

|                                                      | (1)                 | (2)                 | (3)                 | (4)                  | (5)                |
|------------------------------------------------------|---------------------|---------------------|---------------------|----------------------|--------------------|
|                                                      | PTSD                | PTSD ( $\geq 2.5$ ) | PHQ-9               | PHQ-9 ( $\geq 10$ )  | PHQ-9 ( $\geq 5$ ) |
| =1 if Experience imprisonment                        | -0.120<br>(0.092)   | -0.003<br>(0.019)   | 0.127<br>(0.876)    | -0.004<br>(0.063)    | -0.061<br>(0.144)  |
| =1 if Experience serious injury                      | 0.034<br>(0.078)    | -0.053<br>(0.033)   | 0.164<br>(0.709)    | -0.025<br>(0.059)    | 0.131<br>(0.106)   |
| =1 if Experience combat situation                    | -0.147*<br>(0.077)  | -0.031<br>(0.037)   | -0.712<br>(0.610)   | -0.067<br>(0.059)    | -0.082<br>(0.085)  |
| =1 if Experience rape or sexual abuse                | 0.110<br>(0.277)    | 0.148<br>(0.230)    | 0.586<br>(1.939)    | 0.085<br>(0.230)     | 0.251<br>(0.164)   |
| =1 if Experience isolation                           | 0.129*<br>(0.068)   | 0.031<br>(0.034)    | 0.471<br>(0.558)    | 0.094*<br>(0.053)    | 0.046<br>(0.082)   |
| =1 if Experience being close to death                | 0.132*<br>(0.069)   | 0.031<br>(0.032)    | 1.681***<br>(0.580) | 0.125**<br>(0.051)   | 0.134<br>(0.093)   |
| =1 if Experience force separation from family        | 0.122*<br>(0.071)   | -0.050<br>(0.037)   | -0.721<br>(0.605)   | -0.160***<br>(0.050) | -0.007<br>(0.093)  |
| =1 if Experience murder of family or friend          | 0.135<br>(0.091)    | 0.056<br>(0.056)    | 1.588**<br>(0.661)  | 0.077<br>(0.069)     | 0.270**<br>(0.116) |
| =1 if Experience lost or kidnapped                   | 0.111<br>(0.082)    | -0.050<br>(0.040)   | 0.025<br>(0.774)    | 0.020<br>(0.086)     | 0.107<br>(0.116)   |
| =1 if Experience torture                             | 0.023<br>(0.068)    | 0.040<br>(0.033)    | 0.018<br>(0.547)    | 0.048<br>(0.054)     | -0.058<br>(0.090)  |
| =1 if Experience unnatural death of family or friend | 0.039<br>(0.069)    | 0.013<br>(0.041)    | 1.323**<br>(0.579)  | 0.082<br>(0.064)     | 0.170**<br>(0.078) |
| =1 if Witness imprisonment                           | 0.084<br>(0.054)    | 0.028<br>(0.027)    | 1.065**<br>(0.488)  | 0.096**<br>(0.041)   | 0.004<br>(0.076)   |
| =1 if Witness serious injury                         | -0.000<br>(0.076)   | -0.021<br>(0.034)   | -0.335<br>(0.595)   | -0.057<br>(0.052)    | 0.071<br>(0.084)   |
| =1 if Witness combat situation                       | -0.043<br>(0.076)   | -0.018<br>(0.040)   | -0.065<br>(0.599)   | 0.006<br>(0.053)     | -0.006<br>(0.091)  |
| =1 if Witness rape or sexual abuse                   | 0.062<br>(0.063)    | 0.027<br>(0.024)    | 0.727<br>(0.540)    | 0.043<br>(0.059)     | 0.041<br>(0.076)   |
| =1 if Witness isolation                              | -0.028<br>(0.060)   | 0.010<br>(0.022)    | -0.624<br>(0.523)   | 0.016<br>(0.052)     | -0.082<br>(0.079)  |
| =1 if Witness being close to death                   | 0.096<br>(0.078)    | 0.078*<br>(0.042)   | 2.393***<br>(0.796) | 0.227***<br>(0.068)  | 0.199*<br>(0.110)  |
| =1 if Witness force separation from family           | 0.192**<br>(0.096)  | 0.060<br>(0.054)    | 1.152<br>(0.828)    | 0.072<br>(0.089)     | 0.143<br>(0.105)   |
| =1 if Witness murder of family or friend             | 0.201***<br>(0.067) | 0.018<br>(0.032)    | 0.701<br>(0.573)    | 0.045<br>(0.053)     | 0.021<br>(0.080)   |
| =1 if Witness lost or kidnapped                      | -0.090<br>(0.072)   | -0.021<br>(0.029)   | -0.344<br>(0.656)   | -0.018<br>(0.060)    | 0.035<br>(0.094)   |
| =1 if Witness torture                                | -0.000<br>(0.067)   | -0.025<br>(0.020)   | -0.563<br>(0.627)   | -0.029<br>(0.065)    | -0.088<br>(0.091)  |
| =1 if Witness unnatural death of family or friend    | -0.029<br>(0.078)   | -0.044<br>(0.034)   | 0.278<br>(0.870)    | 0.091<br>(0.094)     | 0.074<br>(0.131)   |
| Number of observations                               | 361                 | 361                 | 353                 | 353                  | 353                |

Notes. \*\*\* $p < 0.01$ , \*\* $p < 0.05$ , \* $p < 0.10$ . Each column is a separate model. All models include controls for adolescent age, gender, school enrollment, asset index, upazila of camp and sampling considerations. Standard errors clustered at the camp-block level are in parentheses.
